# Supplementary material
Source: publisher figshare collection journal article supplement (https://acs.figshare.com/ndownloader/files/12379934)
Supplement: Supplementary file 1 [file 12379934]

## **Supporting Information**

### **Neuroprotective Activities of Heparin, Heparinase III, and Hyaluronic Acid on the A $\beta$ 42-treated Forebrain Spheroids Derived from Human Stem Cells**

Julie Bejoy<sup>1</sup>, Liqing Song<sup>1</sup>, Zhe Wang<sup>2</sup>, Qing-Xiang Sang<sup>2,3</sup>, Yi Zhou<sup>4</sup>, Yan Li<sup>\*,1,3</sup>

<sup>1</sup>Department of Chemical and Biomedical Engineering; FAMU-FSU College of Engineering; Florida State University; Tallahassee, FL USA

<sup>2</sup>Department of Chemistry and Biochemistry, Florida State University, Tallahassee, Florida, USA

<sup>3</sup>Institute of Molecular Biophysics, Florida State University, Tallahassee, Florida, USA

<sup>4</sup>Department of Biomedical Sciences, College of Medicine, Florida State University, Tallahassee, Florida, USA

**Number of pages: 7**

**Number of figures: 3**

**Number of tables: 2**

#### **Table of contents**

**Supplementary Figure S1.** Characterization of cortical and hippocampal differentiation from human induced pluripotent stem (iPS) cells.

**Supplementary Figure S2.** Expression of MMP-9, Perlecan (a HSPG protein), CSPG, and hyaluronic acid (HA) for cortical and hippocampal groups.

**Supplementary Figure S3.** Effect of A $\beta$ 42 treatment.

**Supplementary Figure S4.** Glutamate and GABA expression for cortical and hippocampal cells after A $\beta$ 42 treatment.

**Supplementary Figure S5.** Effects of Chabc and heparinase III on expression of MMP-9, Perlecan, CSPG, and HA.

**Supplementary Table S1.** A list of antibodies.

**Supplementary Table S2.** Primer sequence for target genes.

**Supplementary Figure S1. Characterization of cortical and hippocampal differentiation from human induced pluripotent stem (iPS) cells.** (A) Phase contrast images of cortical spheroids and hippocampal spheroids and the replated spheroids. Scale bar: 200  $\mu$ m. (B) RT-PCR analysis of vGluT1 gene expression. Neural spheroids derived with cortical and hippocampal protocols were compared.

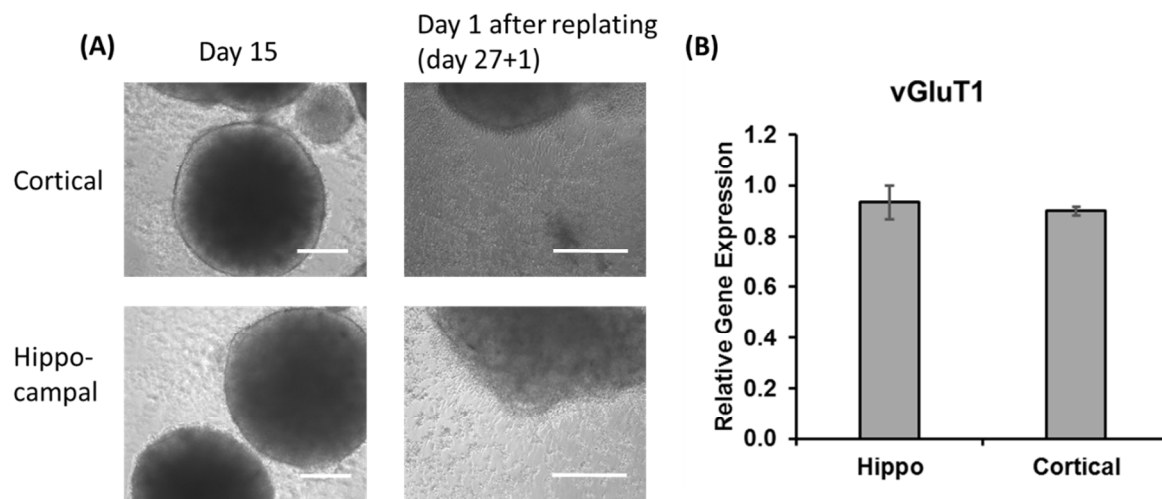

**Supplementary Figure S2. Expression of MMP-9, Perlecan (a HSPG protein), CSPG, and hyaluronic acid (HA) for cortical and hippocampal groups. Scale bar: 100  $\mu$ m. The expression pattern showed circular signals around the cells or deposition among the cells.**

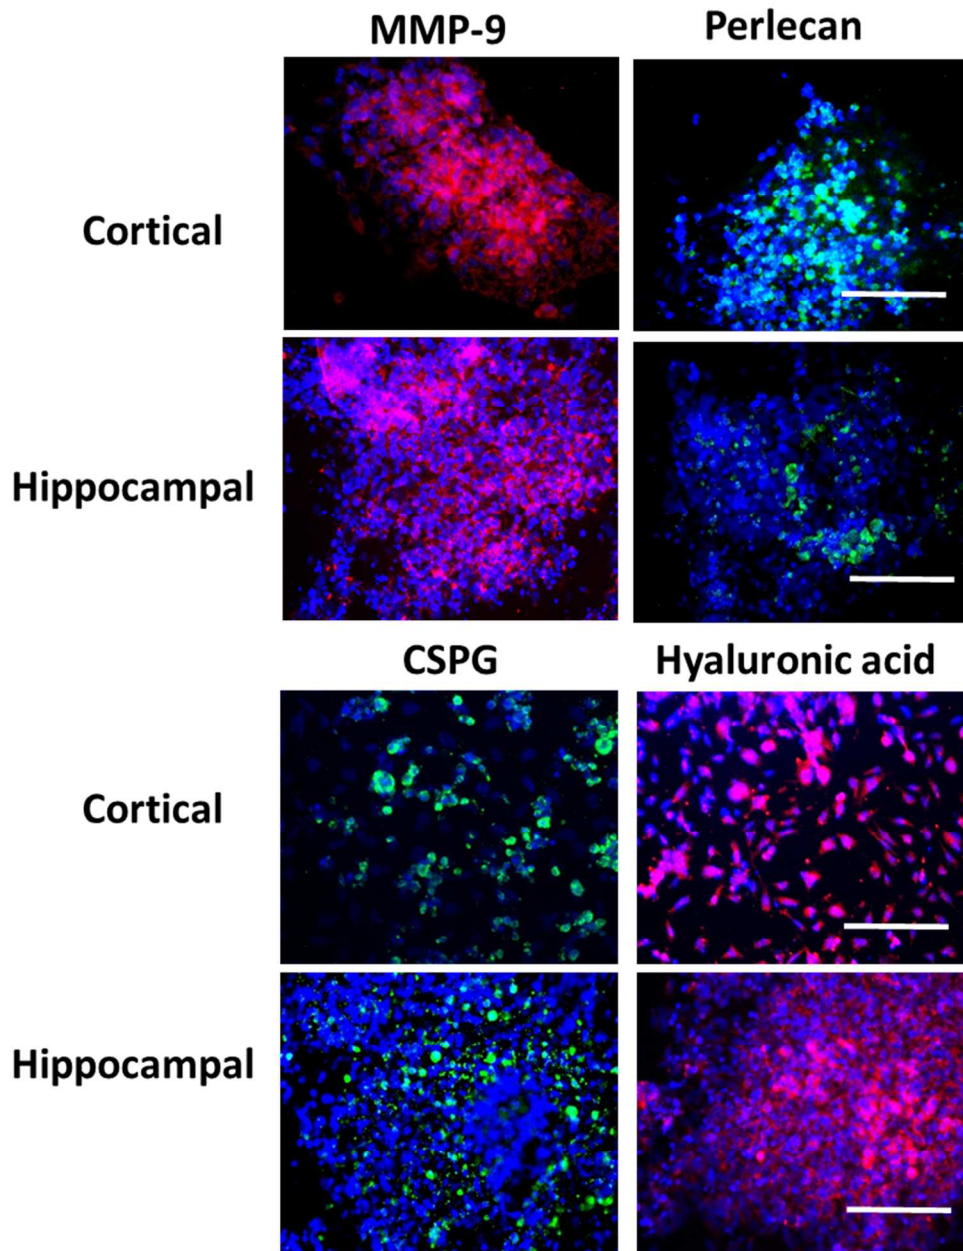

**Supplementary Figure S3. Effect of A $\beta$ 42 treatment.** (A) Two-color flow cytometry analysis of the Live/Dead cells showing decreased percentage of viable cells after A $\beta$ 42 treatment. (B) Flow cytometry analysis of MAP2 showing decreased neuron population after A $\beta$ 42 treatment. Black line: negative control. Red line: marker of interest.

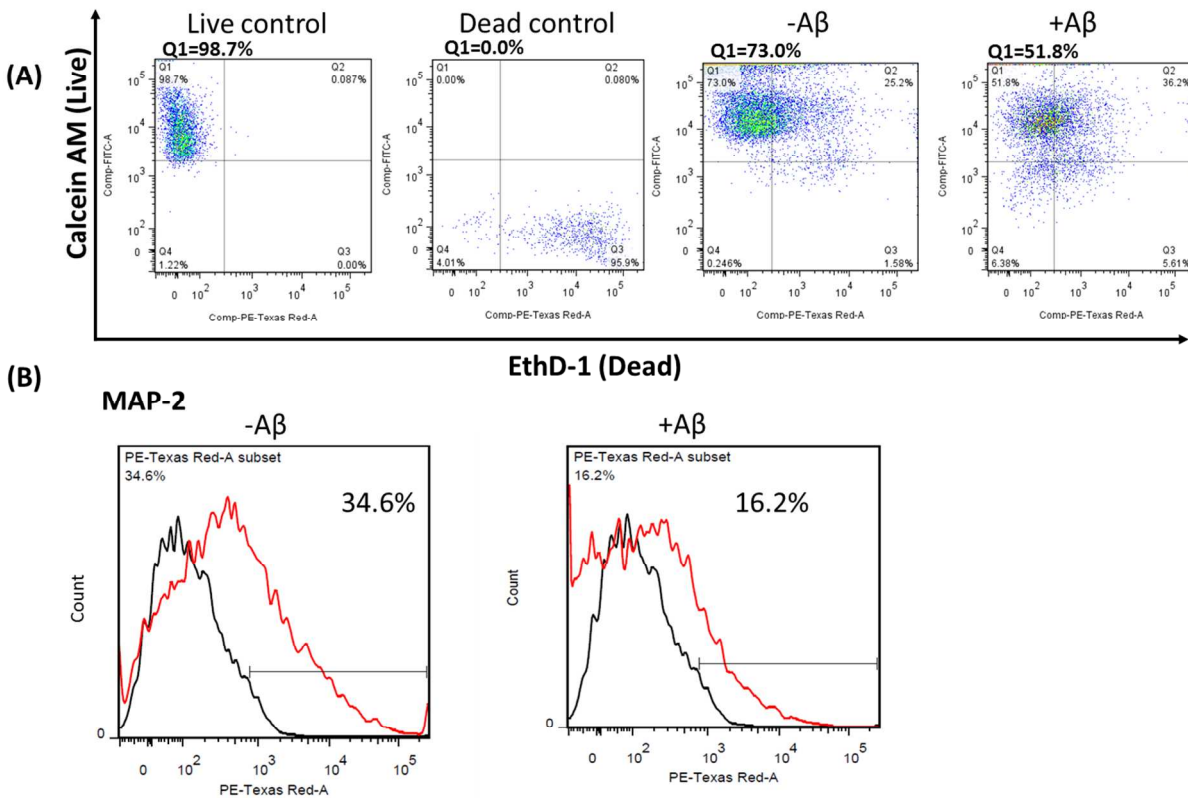

**Supplementary Figure S4. Glutamate and GABA expression for cortical and hippocampal cells after A $\beta$ 42 treatment.** Red: Glutamate or GABA. Blue: Hoechst. Scale bar: 100  $\mu$ m.

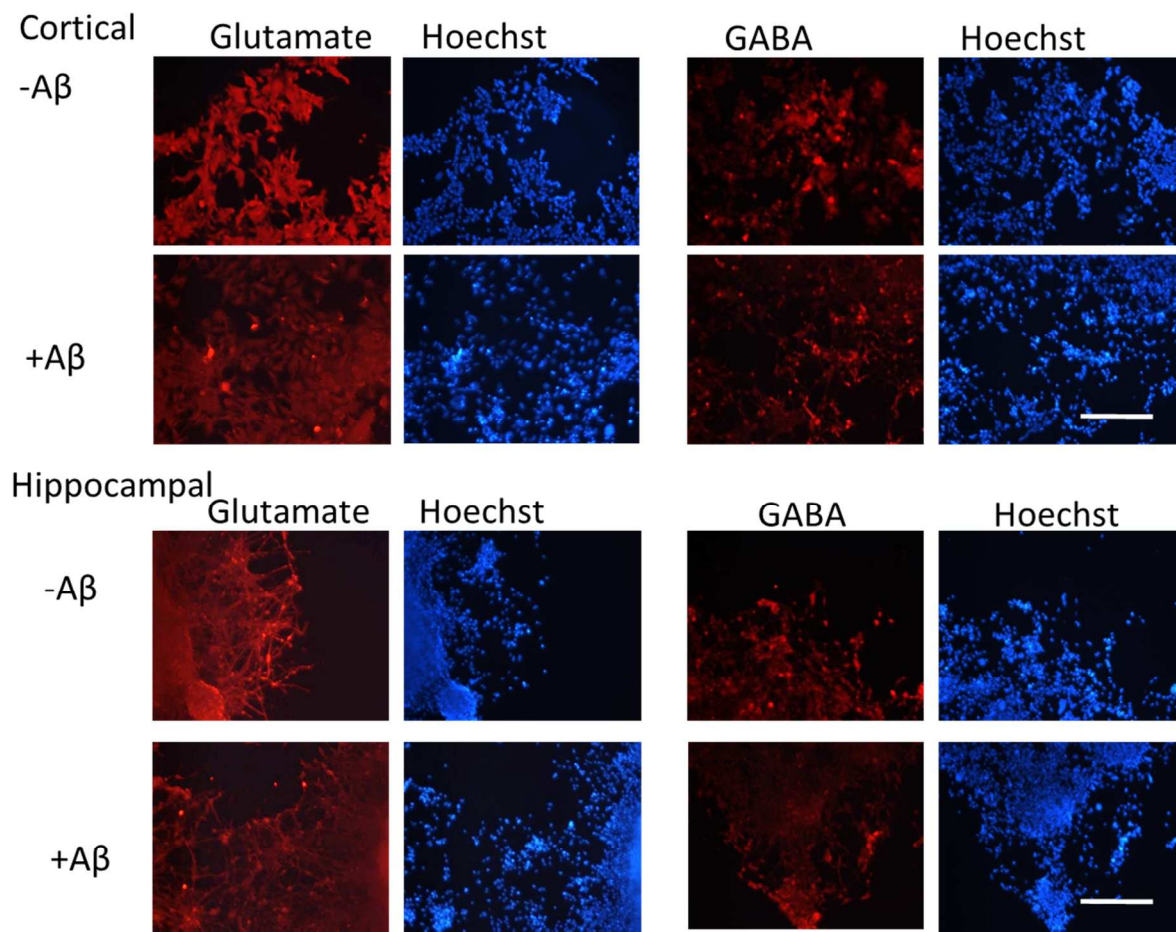



**Supplementary Figure S5. Effects of Chabc and heparinase III on expression of MMP-9, Perlecan, CSPG, and HA.** The cortical population was treated with heparinase III (HepIII) and Chabc (non-treated group can be seen Supplementary Figure S2). Scale bar: 100  $\mu$ m. MMP-9 expression was not affected by the enzymatic treatment. HepIII treatment reduced the expression of Perlecan and HA. Chabc treatment reduced the expression of Perlecan and CSPG, and altered HA expression pattern (more dot-like).

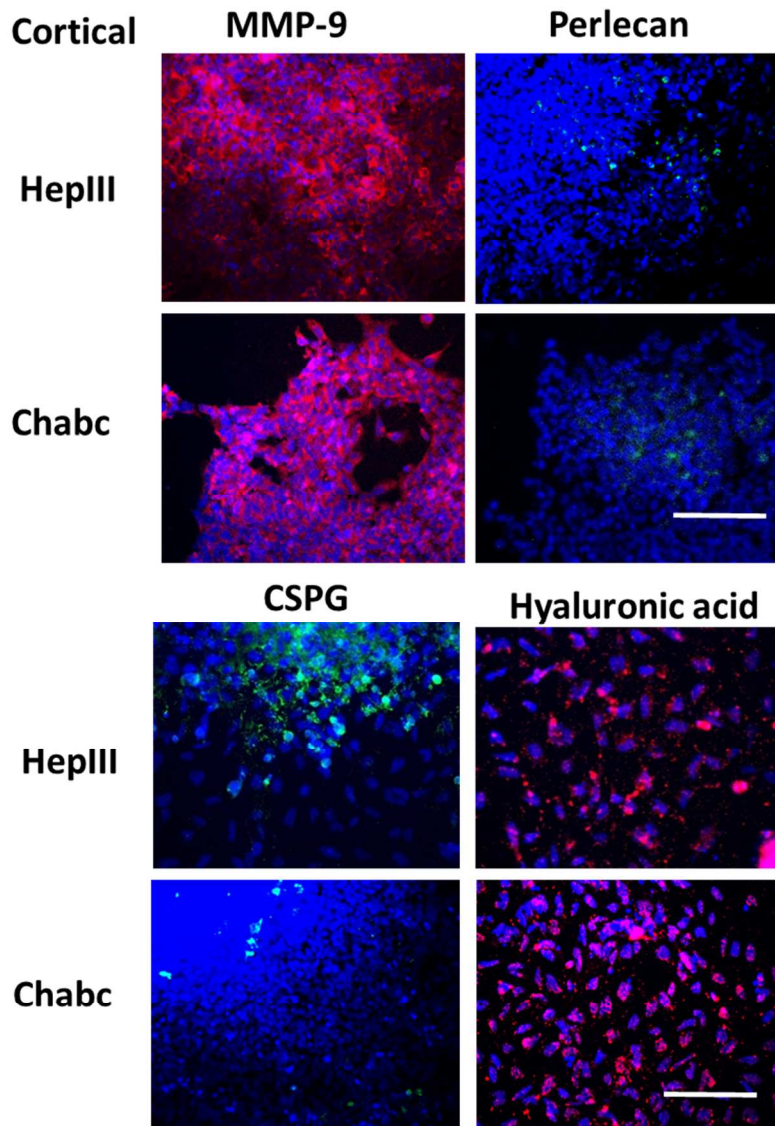

**Supplementary Table S1. A list of antibodies.**

| <b>Cells</b>    | <b>Primary Antibody</b>                         | <b>Origin/ Isotype</b> | <b>Supplier/ Cat#</b>           | <b>Dilution</b> |
|-----------------|-------------------------------------------------|------------------------|---------------------------------|-----------------|
| Cortical layers | TBR1 (layer VI)                                 | Rabbit IgG             | ABCAM, ab31940                  | 1:200           |
|                 | BRN2 (layer III)                                | Goat IgG               | Santa Cruz, sc-6029             | 1:200           |
| Dentate gyrus   | PROX1                                           | Rabbit IgG             | ABCAM, ab101851                 | 1:500           |
| Neurons         | $\beta$ -tubulin III                            | Mouse IgG <sub>1</sub> | Millipore, MAB1637              | 1:200           |
|                 | MAP-2                                           | Rabbit IgG             | ABCAM, ab32454                  | 1:200           |
|                 | Glutamate                                       | Rabbit IgG             | Sigma, G6642                    | 1:1000          |
|                 | GABA                                            | Rabbit IgG             | Sigma, A2052                    | 1:1000          |
|                 | A $\beta$ 42                                    | Rabbit IgG             | ABCAM, ab10148                  | 1:200           |
| Pathway         | Tau                                             | Mouse IgG <sub>1</sub> | Sigma, T9450                    | 1:100           |
|                 | Phospho-PHF-tau<br>pSer202+Thr205 (AT8)         | Mouse IgG <sub>1</sub> | Thermal Fisher,<br>MN1020       | 1:200           |
|                 | MMP-9                                           | Goat IgG               | Santa Cruz, sc-6840             | 1:200           |
|                 | Perlecan                                        | Mouse IgG <sub>1</sub> | Santa Cruz, sc-377219           | 1:50            |
|                 | CSPG                                            | Mouse IgM              | Life Technologies,<br>MA1-83055 | 1:100           |
|                 | Hyaluronic acid                                 | Sheep IgG              | Life Technologies,<br>PA1-85561 | 1:50            |
|                 | Alexa 488, goat anti-<br>mouse IgG <sub>1</sub> | -                      | Life Technologies,<br>A-21121   | 1:200           |
|                 | Alexa 488, goat anti-<br>rabbit IgG             | -                      | Life Technologies,<br>A-11008   | 1:200           |
|                 | Alexa 488, goat anti-<br>mouse IgM              | -                      | Life Technologies,<br>A-21042   | 1:200           |
|                 | Alexa 594, goat anti-<br>rabbit IgG             | -                      | Life Technologies,<br>A-11012   | 1:400           |
|                 | Alexa 594, donkey anti-<br>goat IgG             | -                      | Life Technologies,<br>A-11058   | 1:400           |
|                 | Alexa 594, donkey anti-<br>sheep IgG            | -                      | Life Technologies,<br>A-11016   | 1:400           |

**Supplementary Table S2. Primer sequence for target genes.**

| <b>Gene</b> | <b>Forward primer 5' to 3'</b> | <b>Reverse primer 5' to 3'</b> |
|-------------|--------------------------------|--------------------------------|
| TBR1        | CCCCCTCGTCTTTCTCTTACC          | TAATGTGGAGGCCGAGACTTG          |
| vGluT1      | CCCCAATTCCTCGCACTTTAT          | GGGAAGGATCCCAGATTTTGA          |
| PROX1       | GACTTTGAGGTTCCAGAGAGA          | TGTAGGCAGTTCGGGGATTG           |
| Beta-actin  | GTACTCCGTGTGGATCGGCG           | AAGCATTTGCGGTGGACGATGG         |
